# Supplementary material for: Construction and Characterization of Insect Cell-Derived Influenza VLP: Cell Binding, Fusion, and EGFP Incorporation
Source: Hindawi journal article supplement (doi:10.1155/2010/506363), 2010-01-01
Supplement: f1 [file 506363.f1.doc]

**Fig. S1 Removal of sialic acids on cell surface by neuraminidase from *Vibrio cholerae.*** 3X105 cells of A549 cells were seeded in a 3.5 cm culture dish containing a glass cover slip (22X22 mm2) and cultured overnight. The cells were washed twice with PBS and added DMEM medium containing variant concentration of neuraminidase. The cells were incubated at 37 ℃ for 2 hrs and washed with PBS. The cover slips were transferred into new dishes and added 200 ul of PBS containing 1% BSA, 2 g of biotinylated *Maackia amurensis* lectin II, 2 g of biotinylated *Sambucus Nigra* lectin. The cells were incubated on ice for 30 min, washed three times with ice-cold PBS and added 200 l of PBS containing 1% BSA and 1.5 g of fluorescein streptavidin. The cells were incubated on ice for 30 min, washed three times with ice-cold PBS and fixed with 4% paraformaldehyde at R.T. for 8 mins. The cover slips were rinsed with PBS and mounted onto glass slide with 5 l of PBS containing 50% of glycerol. The fluorescent images were captured by inverted fluorescence microscope (Aviovert, Carl Zeiss Inc.) with oil immersion objective (Plan-Apo 40X, N.A. 1.3) and processed by MetaMorph software (Carl Zeiss Meditec, Gottingen, Germany).
